# Supplementary material for: Guidance to best tools and practices for systematic reviews
Source: PubMed Central journal article supplement (PMC10464882; doi:10.11124/jbies-23-00139), 2023-06-07
Supplement: srx-21-1699-s006.pdf [file srx-21-1699-s006.pdf]

## Supplemental file 6: Links to Concise Guide online resources

| Methodological guidance                                   |                                                                                                                                                                                                                                                                                       |
|-----------------------------------------------------------|---------------------------------------------------------------------------------------------------------------------------------------------------------------------------------------------------------------------------------------------------------------------------------------|
| <b>Cochrane</b>                                           |                                                                                                                                                                                                                                                                                       |
| Intervention                                              | <a href="https://training.cochrane.org/handbook/current">https://training.cochrane.org/handbook/current</a>                                                                                                                                                                           |
| Diagnostic                                                | <a href="https://training.cochrane.org/diagnostic-test-accuracy-dta-reviews">https://training.cochrane.org/diagnostic-test-accuracy-dta-reviews</a>                                                                                                                                   |
| Prognostic                                                | <a href="https://training.cochrane.org/resource/systematic-review-prognosis-studies">https://training.cochrane.org/resource/systematic-review-prognosis-studies</a>                                                                                                                   |
| Qualitative                                               | <a href="https://training.cochrane.org/handbook/current/chapter-21">https://training.cochrane.org/handbook/current/chapter-21</a>                                                                                                                                                     |
| Overviews                                                 | <a href="https://training.cochrane.org/handbook/current/chapter-v">https://training.cochrane.org/handbook/current/chapter-v</a>                                                                                                                                                       |
| <b>JB1</b>                                                |                                                                                                                                                                                                                                                                                       |
| Intervention                                              | <a href="https://jbi-global-wiki.refined.site/space/MANUAL/4688621/Chapter+3%3A+Systematic+reviews+of+effectiveness">https://jbi-global-wiki.refined.site/space/MANUAL/4688621/Chapter+3%3A+Systematic+reviews+of+effectiveness</a>                                                   |
| Diagnostic test accuracy                                  | <a href="https://jbi-global-wiki.refined.site/space/MANUAL/4687355/Chapter+9%3A+Diagnostic+test+accuracy+systematic+reviews">https://jbi-global-wiki.refined.site/space/MANUAL/4687355/Chapter+9%3A+Diagnostic+test+accuracy+systematic+reviews</a>                                   |
| Prevalence and incidence                                  | <a href="https://jbi-global-wiki.refined.site/space/MANUAL/4688607/Chapter+5%3A+Systematic+reviews+of+prevalence+and+incidence">https://jbi-global-wiki.refined.site/space/MANUAL/4688607/Chapter+5%3A+Systematic+reviews+of+prevalence+and+incidence</a>                             |
| Etiology and risk                                         | <a href="https://jbi-global-wiki.refined.site/space/MANUAL/4687372/Chapter+7%3A+Systematic+reviews+of+etiology+and+risk">https://jbi-global-wiki.refined.site/space/MANUAL/4687372/Chapter+7%3A+Systematic+reviews+of+etiology+and+risk</a>                                           |
| Measurement properties                                    | <a href="https://jbi-global-wiki.refined.site/space/MANUAL/4686202/Chapter+12%3A+Systematic+reviews+of+measurement+properties">https://jbi-global-wiki.refined.site/space/MANUAL/4686202/Chapter+12%3A+Systematic+reviews+of+measurement+properties</a>                               |
| Umbrella reviews                                          | <a href="https://jbi-global-wiki.refined.site/space/MANUAL/4687363/Chapter+10%3A+Umbrella+reviews">https://jbi-global-wiki.refined.site/space/MANUAL/4687363/Chapter+10%3A+Umbrella+reviews</a>                                                                                       |
| Scoping reviews                                           | <a href="https://jbi-global-wiki.refined.site/space/MANUAL/4687342/Chapter+11%3A+Scoping+reviews">https://jbi-global-wiki.refined.site/space/MANUAL/4687342/Chapter+11%3A+Scoping+reviews</a>                                                                                         |
| Reporting guidelines                                      |                                                                                                                                                                                                                                                                                       |
| eMERGe                                                    | <a href="https://emergeproject.org/">https://emergeproject.org/</a>                                                                                                                                                                                                                   |
| ENTREQ                                                    | <a href="https://doi.org/10.1186/1471-2288-12-181">https://doi.org/10.1186/1471-2288-12-181</a>                                                                                                                                                                                       |
| PRIOR                                                     | <a href="https://doi.org/10.1136/bmj-2022-070849">https://doi.org/10.1136/bmj-2022-070849</a>                                                                                                                                                                                         |
| PRISMA 2020                                               | <a href="http://www.prisma-statement.org/">http://www.prisma-statement.org/</a>                                                                                                                                                                                                       |
| PRISMA-DTA                                                | <a href="http://prisma-statement.org/Extensions/DTA">http://prisma-statement.org/Extensions/DTA</a>                                                                                                                                                                                   |
| PRISMA-P                                                  | <a href="http://www.prisma-statement.org/Extensions/Protocols">http://www.prisma-statement.org/Extensions/Protocols</a>                                                                                                                                                               |
| PRISMA-ScR                                                | <a href="http://www.prisma-statement.org/Extensions/ScopingReviews">http://www.prisma-statement.org/Extensions/ScopingReviews</a>                                                                                                                                                     |
| SWiM                                                      | <a href="https://www.bmj.com/content/368/bmj.l6890">https://www.bmj.com/content/368/bmj.l6890</a>                                                                                                                                                                                     |
| Risk of bias assessment tools for primary studies         |                                                                                                                                                                                                                                                                                       |
| CASP Qualitative Checklist                                | <a href="https://casp-uk.net/images/checklist/documents/CASP-Qualitative-Studies-Checklist/CASP-Qualitative-Checklist-2018_fillable_form.pdf">https://casp-uk.net/images/checklist/documents/CASP-Qualitative-Studies-Checklist/CASP-Qualitative-Checklist-2018_fillable_form.pdf</a> |
| JB1 Critical Appraisal Checklist for qualitative research | <a href="https://jbi-global-wiki.refined.site/space/MANUAL/4687846/Appendix+2.1%3A+JB1+Critical+Appraisal+Checklist+for+Qualitative+Research">https://jbi-global-wiki.refined.site/space/MANUAL/4687846/Appendix+2.1%3A+JB1+Critical+Appraisal+Checklist+for+Qualitative+Research</a> |
| Cochrane RoB2                                             | <a href="https://methods.cochrane.org/bias/resources/rob-2-revised-cochrane-risk-bias-tool-randomized-trials">https://methods.cochrane.org/bias/resources/rob-2-revised-cochrane-risk-bias-tool-randomized-trials</a>                                                                 |

| <b>Risk of bias assessment tools for primary studies (continued)</b>    |                                                                                                                                                                                                                                                                                                           |
|-------------------------------------------------------------------------|-----------------------------------------------------------------------------------------------------------------------------------------------------------------------------------------------------------------------------------------------------------------------------------------------------------|
| COSMIN RoB Checklist                                                    | <a href="https://www.cosmin.nl/tools/guideline-conducting-systematic-review-outcome-measures">https://www.cosmin.nl/tools/guideline-conducting-systematic-review-outcome-measures</a>                                                                                                                     |
| JBI Critical Appraisal Instrument for Studies Reporting Prevalence Data | <a href="https://jbi-global-wiki.refined.site/space/MANUAL/4688355/Appendix+5.1%3A+Critical+Appraisal+Instrument+for+Studies+Reporting+Prevalence+Data">https://jbi-global-wiki.refined.site/space/MANUAL/4688355/Appendix+5.1%3A+Critical+Appraisal+Instrument+for+Studies+Reporting+Prevalence+Data</a> |
| PROBAST                                                                 | <a href="https://www.probast.org/">https://www.probast.org/</a>                                                                                                                                                                                                                                           |
| ROBINS-I                                                                | <a href="https://methods.cochrane.org/bias/risk-bias-non-randomized-studies-interventions">https://methods.cochrane.org/bias/risk-bias-non-randomized-studies-interventions</a>                                                                                                                           |
| QUADAS-2                                                                | <a href="https://www.bristol.ac.uk/population-health-sciences/projects/quadas/quadas-2/">https://www.bristol.ac.uk/population-health-sciences/projects/quadas/quadas-2/</a>                                                                                                                               |
| QUIPS                                                                   | <a href="https://www.acpjournals.org/doi/full/10.7326/0003-4819-158-4-201302190-00009">https://www.acpjournals.org/doi/full/10.7326/0003-4819-158-4-201302190-00009</a>                                                                                                                                   |
| <b>Overall certainty of evidence</b>                                    |                                                                                                                                                                                                                                                                                                           |
| <i>For intervention reviews</i>                                         |                                                                                                                                                                                                                                                                                                           |
| GRADE                                                                   | <a href="https://www.gradeworkinggroup.org/">https://www.gradeworkinggroup.org/</a>                                                                                                                                                                                                                       |
| <i>For other review types</i>                                           |                                                                                                                                                                                                                                                                                                           |
| Qualitative                                                             | <a href="https://www.cerqual.org/">https://www.cerqual.org/</a>                                                                                                                                                                                                                                           |
|                                                                         | <a href="https://jbi-global-wiki.refined.site/space/MANUAL/4689627/2.7.3+ConQual+'Summary+of+Findings'">https://jbi-global-wiki.refined.site/space/MANUAL/4689627/2.7.3+ConQual+'Summary+of+Findings'</a>                                                                                                 |
| Measurement properties                                                  | <a href="https://www.cosmin.nl/tools/guideline-conducting-systematic-review-outcome-measures/">https://www.cosmin.nl/tools/guideline-conducting-systematic-review-outcome-measures/</a>                                                                                                                   |
| <b>Critical appraisal of systematic reviews</b>                         |                                                                                                                                                                                                                                                                                                           |
| AMSTAR-2                                                                | <a href="https://amstar.ca/Amstar-2.php">https://amstar.ca/Amstar-2.php</a>                                                                                                                                                                                                                               |
| ROBIS                                                                   | <a href="http://www.bristol.ac.uk/population-health-sciences/projects/robis/">http://www.bristol.ac.uk/population-health-sciences/projects/robis/</a>                                                                                                                                                     |
